# Supplementary material for: Targeted synthesis of an electroactive organic framework
Source: Royal Society of Chemistry journal article supplement (doi:10.1039/c1jm12545a), 2011-01-01
Supplement: c1jm12545a.pdf [file c1jm12545a.pdf]

## Supporting information

### Targeted Synthesis of an Electroactive Organic Framework

*Teng Ben,<sup>1</sup> Kang Shi,<sup>2\*</sup> Yan Cui,<sup>1</sup> Cuiying Pei,<sup>1</sup> Yang Zuo,<sup>2</sup> Han Guo,<sup>1</sup> Daliang*

*Zhang,<sup>1</sup> Jun Xu,<sup>3</sup> Feng Deng<sup>3</sup>, Zhongqun Tian,<sup>2</sup> Shilun Qiu<sup>1\*</sup>*

<sup>1</sup>State Key Laboratory of Inorganic Synthesis and Preparative Chemistry and Department of Chemistry, Jilin University, Changchun, 130012, China, <sup>2</sup> State Key Laboratory of Physical Chemistry of Solid Surfaces and College of Chemistry and Chemical Engineering, Xiamen University, Xiamen, 361005, China, <sup>3</sup>State Key Lab of Magnetic Resonance and Atomic and Molecular Physics, Wuhan Institute of Physics and Mathematics, Wuhan, China.

E-mail: [sqiu@jlu.edu.cn](mailto:sqiu@jlu.edu.cn); [kshi@xmu.edu.cn](mailto:kshi@xmu.edu.cn)

## Table of Contents

|                                                     |    |
|-----------------------------------------------------|----|
| <b>1. Materials</b>                                 | S3 |
| <b>2. Topology design of 3D Frameworks</b>          | S3 |
| <b>3. Investigation of Structure</b>                | S4 |
| <b>4-1. FTIR of Oligo-JUC-Z2 and JUC-Z2</b>         | S4 |
| <b>4-2. AFM study of Oligo-JUC-Z2 and JUC-Z2</b>    | S5 |
| <b>4-3. PXRD of JUC-Z2</b>                          | S6 |
| <b>4. Investigation of Stability</b>                | S7 |
| <b>5-1. TGA of JUC-Z2</b>                           | S7 |
| <b>5. Investigation of Electrochemical Property</b> | S8 |
| <b>6-1. Electrochemical redox process of JUC-Z2</b> | S8 |
| <b>6. References</b>                                | S9 |

## 1. Materials.

The starting materials and solvents were purchased from Aldrich. In electrochemical experiments, tetra-butylammoniumhexafluorophosphate ( $\text{Bu}_4\text{NPF}_6$ ), tetra-butylammoniumperchlorate ( $\text{Bu}_4\text{NClO}_4$ ), tetra-butylammoniumtetrafluoroborate ( $\text{Bu}_4\text{NBF}_4$ ) and tetraethylammonium-toluene-4-sulfonate ( $\text{ET}_4\text{TOS}$ ) were electrochemical grade and were obtained from Aldrich.

## 2. Topology design of 3D Frameworks

The 3D model of JUC-Z2 was obtained with the Materials Studio simulation environment (Version 4.3) employing MS Visualizer. The structures were generated by beginning with the space group  $p6/mmm$ . Laid the center nitrogen atom of the triphenylamine on the trigon centroid, and replaced the C-N bonds with the phenyl rings. Then we performed energy minimization and geometry optimization calculations employing universal and COMPASS force-field to obtain reasonable structures.

### 3. Investigation of Structure of JUC-Z2

#### 3-1. FTIR of JUC-Z2

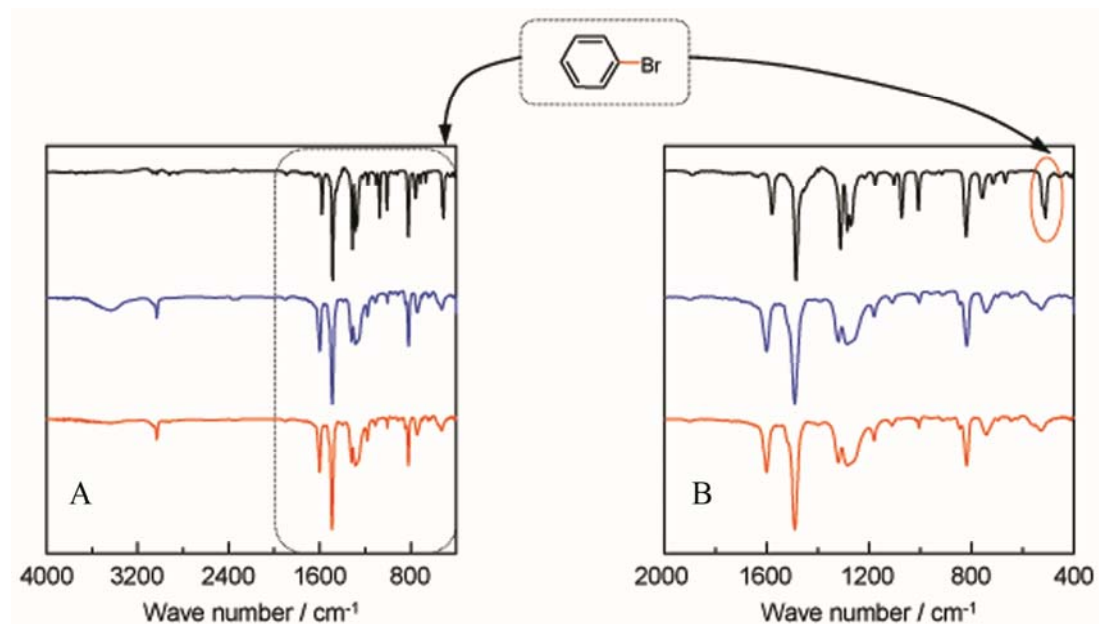

**Figure S1.** FTIR spectra of the JUC-Z2(red), JUC-Z2-4h (blue) and the TBPN (black) from 400- 4000  $\text{cm}^{-1}$ (A) and 400-2000  $\text{cm}^{-1}$  (B). The characteristic adsorption bands for Carbon- Bromine highlighted, clearly showing the lack of bromine in the final product and indicating the formation of the polymeric structure.

### 3-2. AFM study of Oligo-JUC-Z2 and JUC-Z2

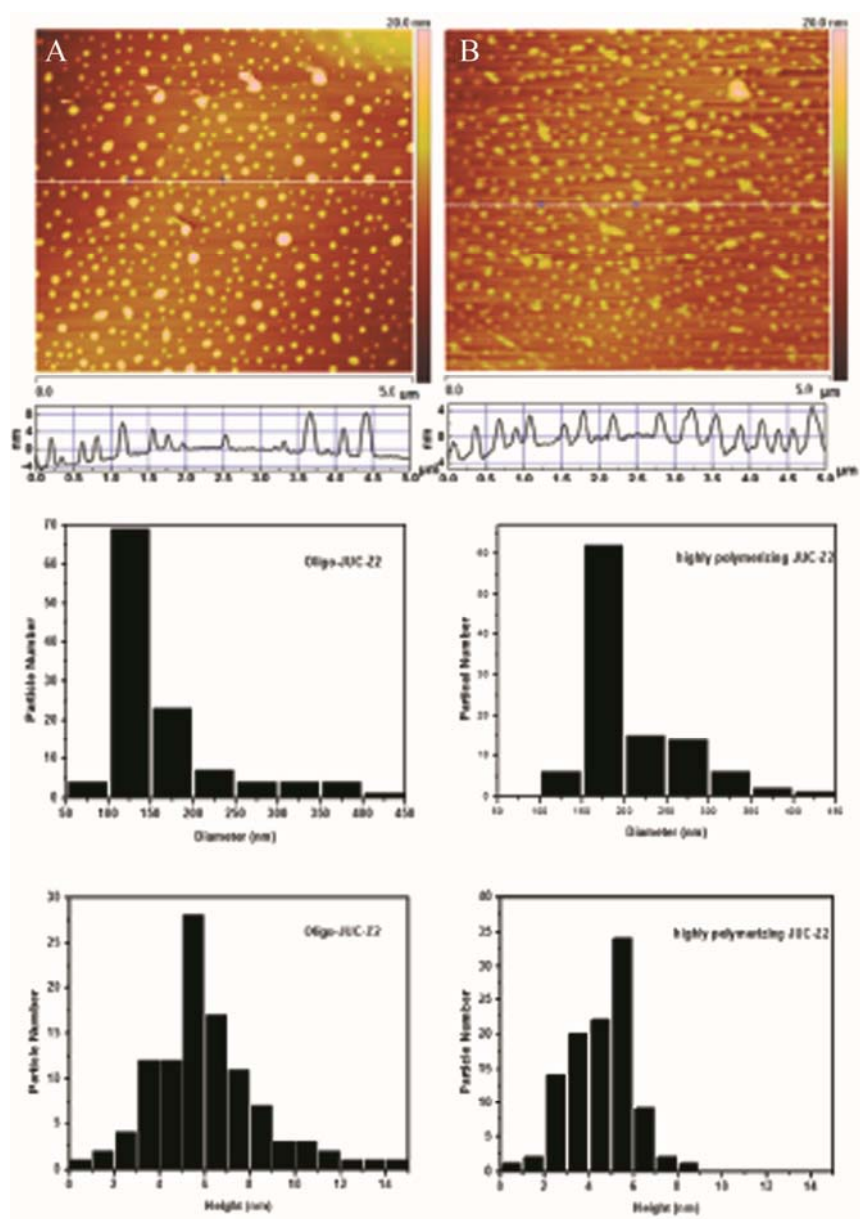

**Figure S2.** Tapping mode AFM images and histogram of Oligo (A) and highly condensed JUC-Z2 (B) on HOPG surface. The white line through the image indicates where the section profile was measured.

### 3-3. PXRD of JUC-Z2

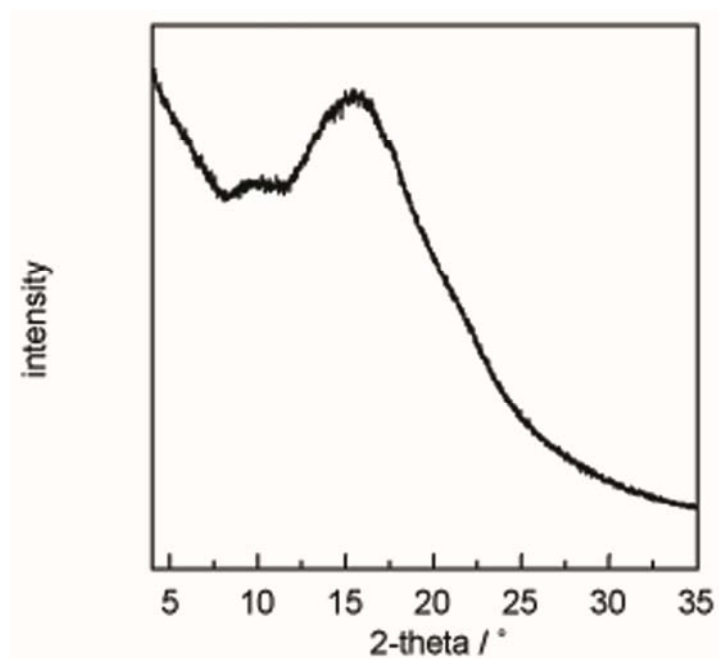

*Figure S3* The PXRD pattern of JUC-Z2

## 4. Investigation of Stability

### 4-1. TGA of JUC-Z2

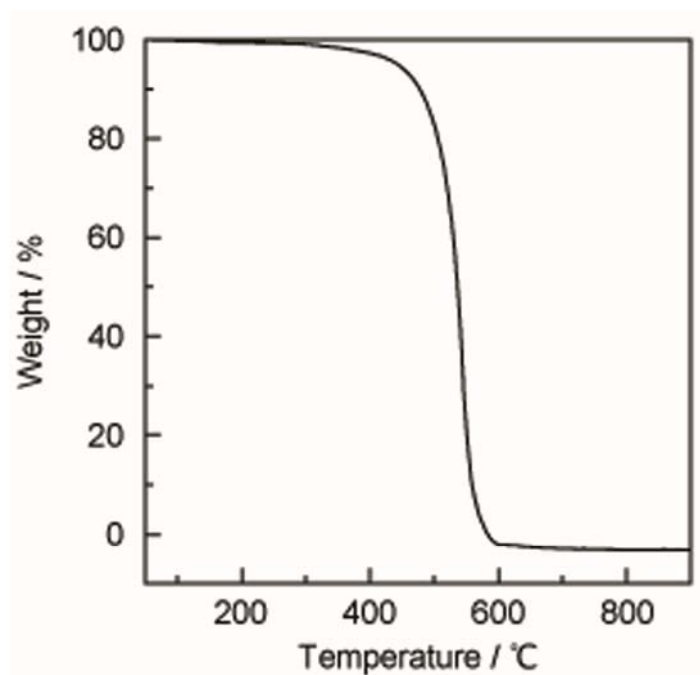

**Figure S4.** TGA plot of JUC-Z2 at air atmosphere, rate of 10 °C/ min

## 5. Investigation of Electrochemical Property

### 5-1. electrochemical redox process of JUC-Z2

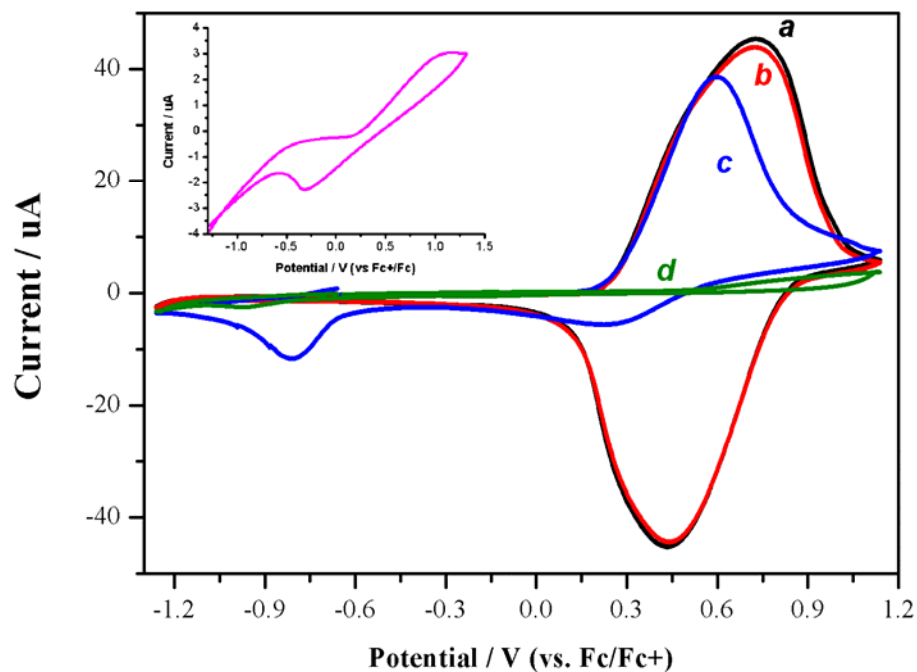

**Figure S5.** Cyclic voltammograms of highly condensed JUC-Z2 powder film on Pt microelectrode at a scan rate of 50 mV/s in the degassed acetonitrile solution containing 0.1 M  $\text{Bu}_4\text{NPF}_6$  at (a) the first and (b) 5<sup>th</sup> cycle; 0.1 M  $\text{ET}_4\text{TOS}$  at (c) the first and (d) 5<sup>th</sup> cycle; (inset) 0.1 M CSA at the first cycle.



## 6. References

- [1] C. S. Cha, C. M. Li, H. X. Yang, P. F. Liu, *J. Electroanal. Chem.* **1994**, 368, 47.
- [2] J. K. Feng, Y. L. Cao, X. P. Ai, H. X. Yang, *J. Power Sources* **2008**, 177, 199.
